# Supplementary material
Source: PubMed Central journal article supplement (PMC5116557)
Supplement: onc2016128x1.pdf [file onc2016128x1.pdf]

## **SUPPLEMENTAL INFORMATION**

### **Figure S1. Lineage differentiation was not involved in the reversion of MSC immunosuppression by IFN $\alpha$ .**

**(A)** MSCs were treated with IFN $\gamma$  and TNF $\alpha$  or IFN $\gamma$ , TNF $\alpha$  and IFN $\alpha$  for 24 hours.

According to the manufacturer's instructions, total RNA was collected and the expression of osteoblast marker genes or adipocyte marker genes was quantitated by real-time PCR. Values are means  $\pm$  SD of a representative result of two independent

experiments. **(B)** MSCs with treated by different cytokines for 72 hours. Calcium deposits were stained by Alizarin Red S (osteogenesis, upper panel). MSCs were stained with Oil Red O to reveal lipid droplets (adipogenesis, lower panel). (bar = 100  $\mu$ m)

### **Figure S2. IFN $\alpha$ does not inhibit iNOS expression in bone marrow-derived macrophages.**

Bone marrow-derived macrophages were stimulated by various combinations of TNF $\alpha$  (10 ng/ml), IFN $\gamma$  (10 ng/ml) or IFN $\alpha$  (2500 U/ml) for 24 hours. The expression of iNOS and pTyr701-Stat1 were examined by western blotting analysis. Values are means  $\pm$  SD of a representative result of two independent experiments.

### **Figure S3. IFN $\alpha$ does not inhibit the production of other cytokines or cytokines by**

## **MSCs.**

MSCs were stimulated by IFN $\gamma$  and TNF $\alpha$  with or without IFN $\alpha$  for 24 hours.

Supernatants were collected and analyzed by Bio-Plex protein array system for cytokines and chemokines, or by Griess assay for nitrate concentration. IFN $\gamma$ /TNF $\alpha$ : 10 ng/ml; IFN $\alpha$  2500 U/ml. Values are means  $\pm$  SD of four wells from a representative of two independent experiments.

### **Figure S4. IFN $\alpha$ does not inhibit the expression of IFN $\gamma$ receptors.**

**(A)** Relative expression levels of IFN $\gamma$  receptor 1 (IFNGR1), IFNGR2, H2-D1, and H2-K1 from microarray data were compared with or without 24-hour treatment of cytokines. **(B)** Surface expression levels of IFNGR1 and IFNGR2 were determined by flow cytometry analysis at 24 hours. Isotype controls were shown in filled grey histograms.

### **Figure S5. NF- $\kappa$ B signaling pathway is not involved in IFN $\alpha$ -induced iNOS inhibition.**

**(A)** MSCs were stimulated with combinations of IFN $\gamma$  and TNF $\alpha$  or IFN $\gamma$ , TNF $\alpha$  and IFN $\alpha$  for indicated time. Total protein was collected and the expression of pSer32-I $\kappa$ B $\alpha$ , I $\kappa$ B $\alpha$  and pSer536-p65 were examined by western blotting analysis. **(B)** MSCs were treated for indicated time. Nucleic proteins were extracted. The distribution of p65 in nucleus was determined by western blotting analysis. Lamin B was reference for nucleic

proteins. **(C)** MSCs were stimulated as previously for 24 hours. Total proteins were collected. p65 was precipitated by sequence-specific oligonucleotide agarose beads. The precipitants were determined by western blotting analysis. Total proteins were inputs. Experiments were repeated twice.

**Figure S6. IFN $\alpha$  inhibits NO production by L-MSCs.**

MSCs and lymphoma-derived MSCs (L-MSCs) were cultured in the presence of TNF $\alpha$  and IFN $\gamma$  with or without IFN $\alpha$  for 12 hours. Supernatants were collected and nitrate concentration was determined by a modified Griess reagent. Values are mean  $\pm$  SD of 3 replicates.

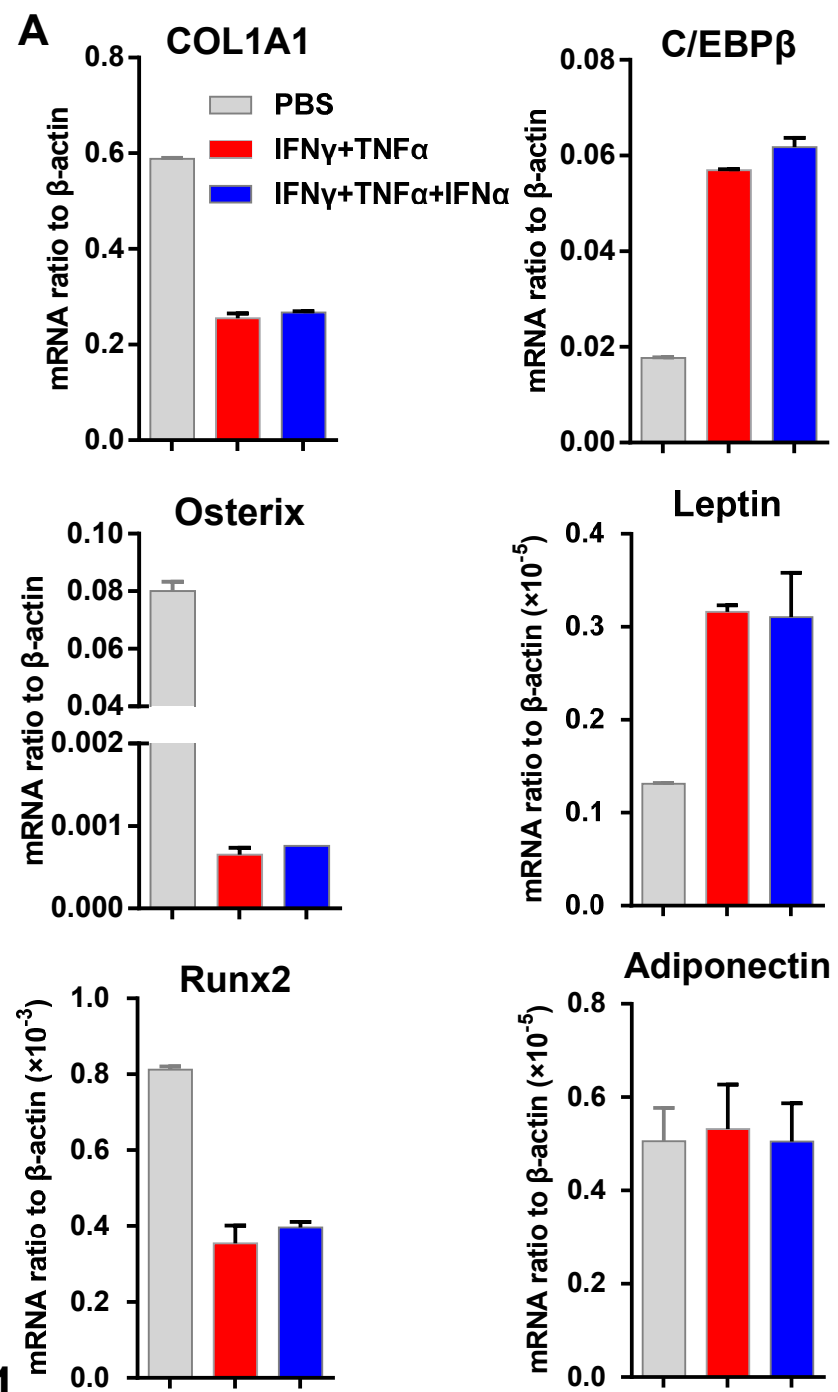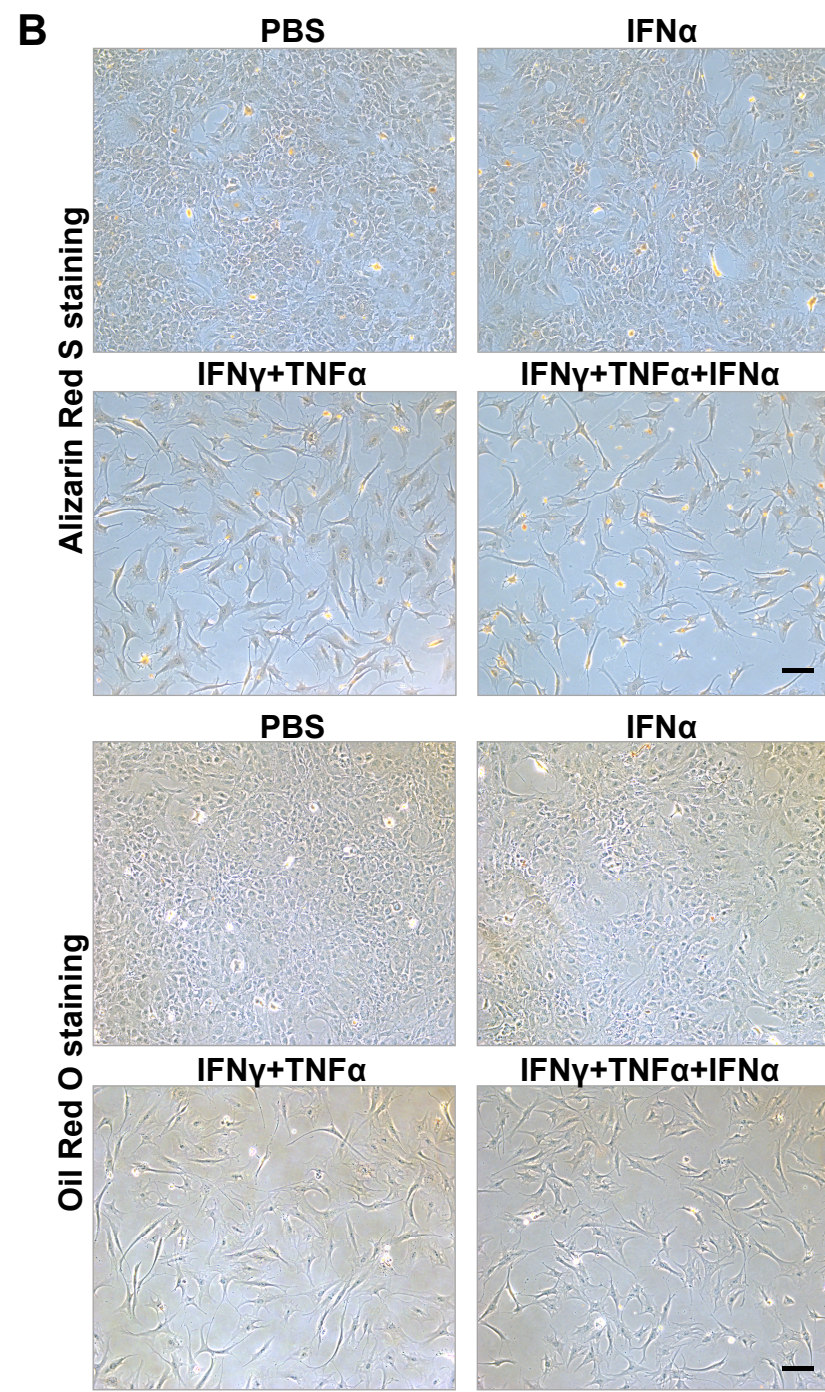

**Fig. S1**

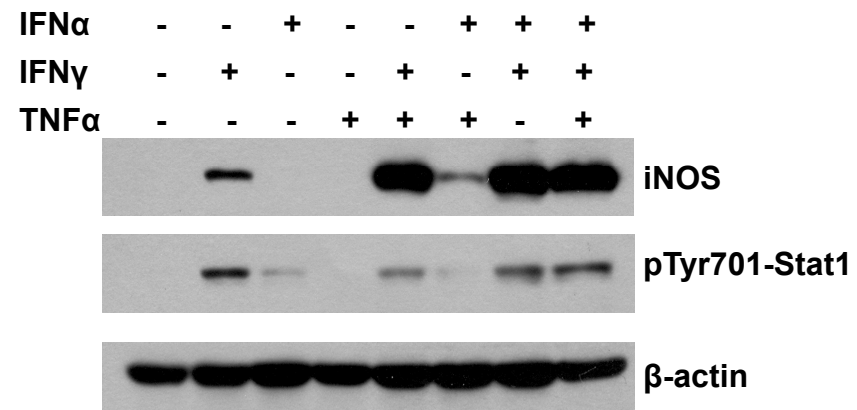

Macrophages derived from bone marrow

Fig. S2

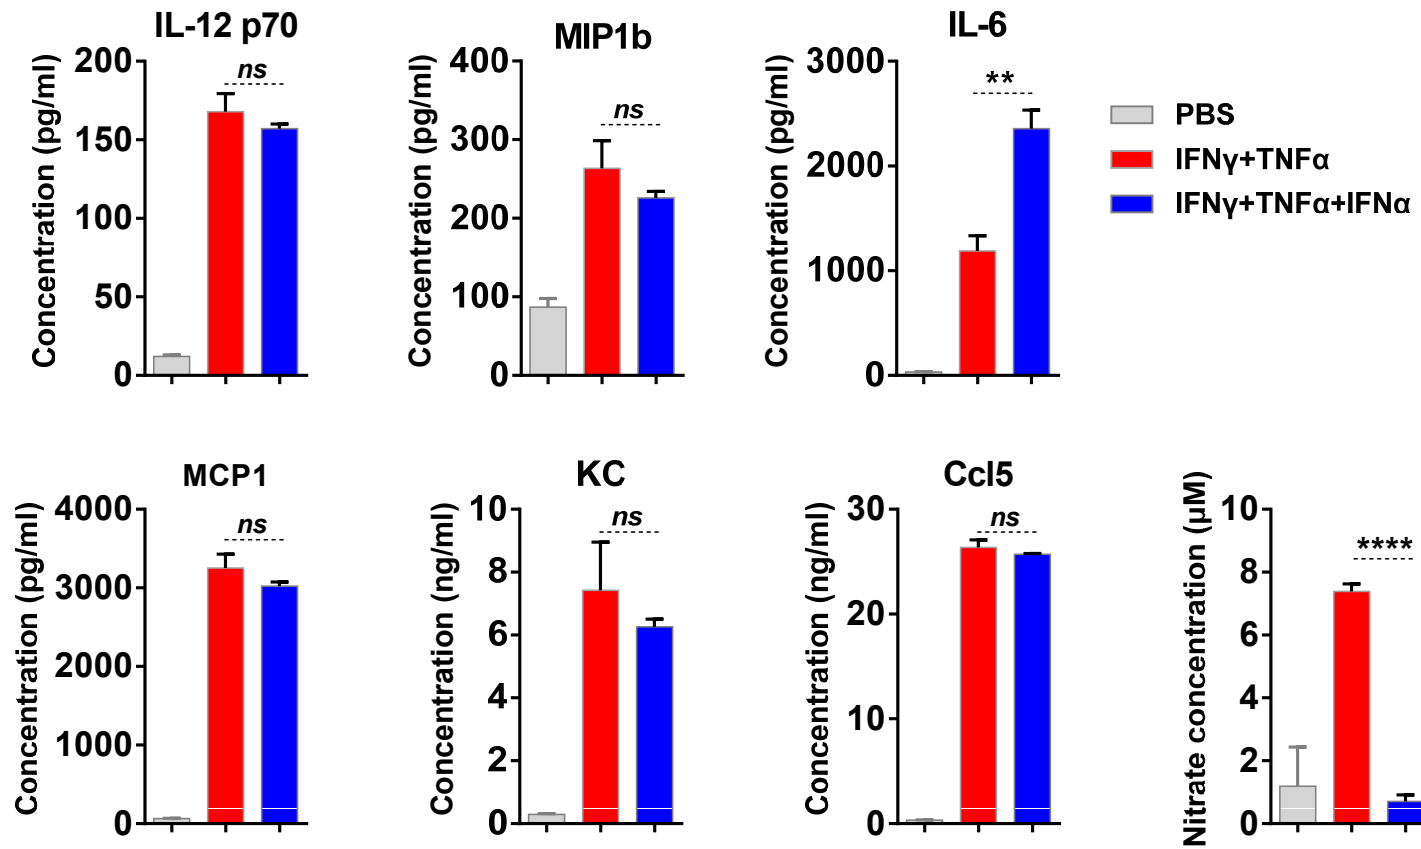

Fig. S3

**A**

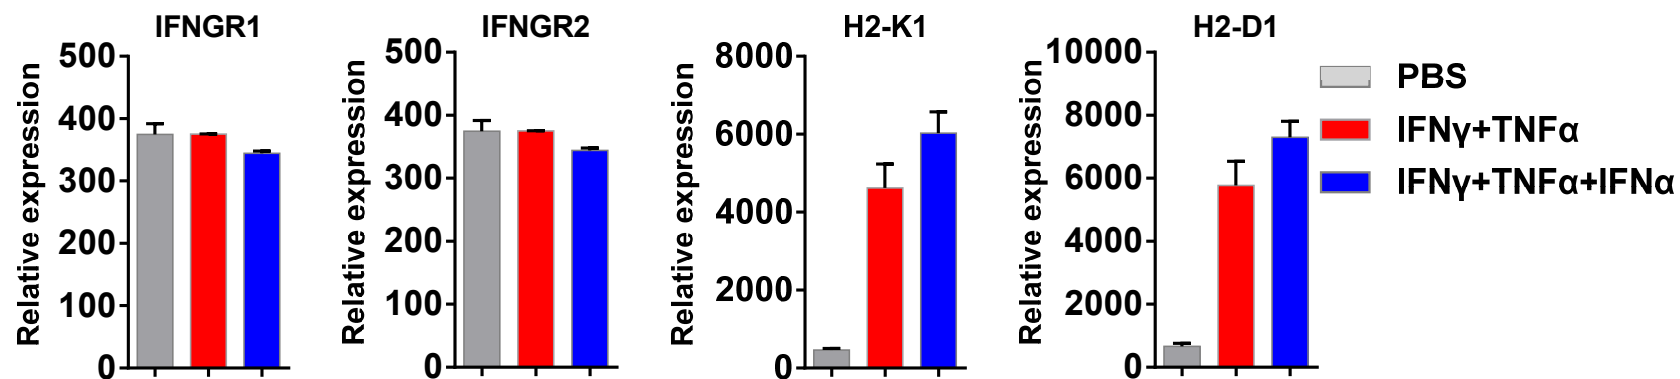

**B**

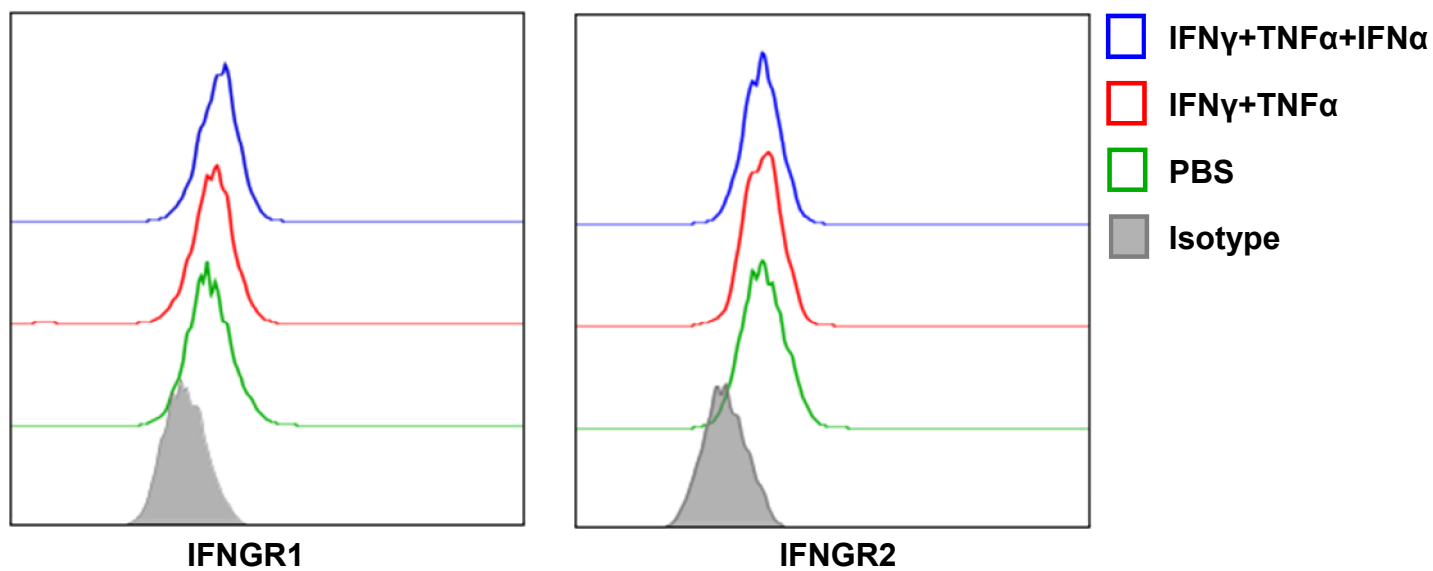

**Fig. S4**

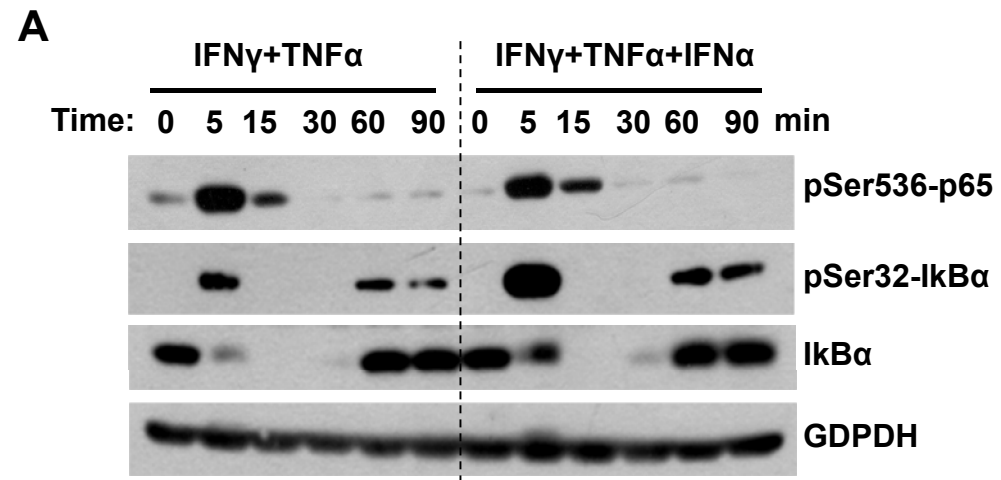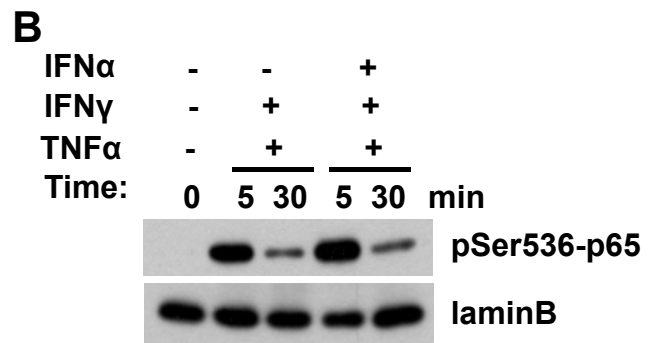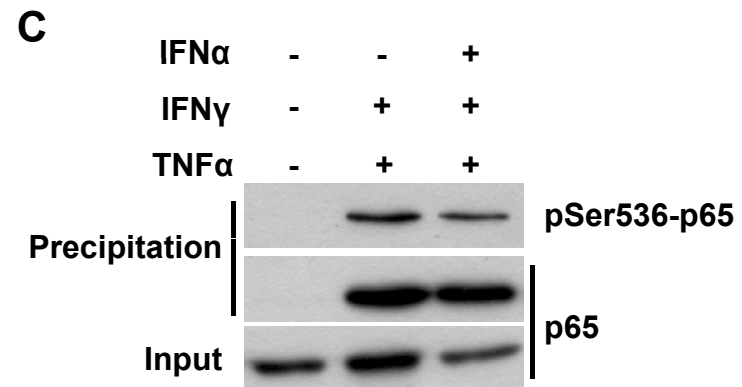

Fig. S5



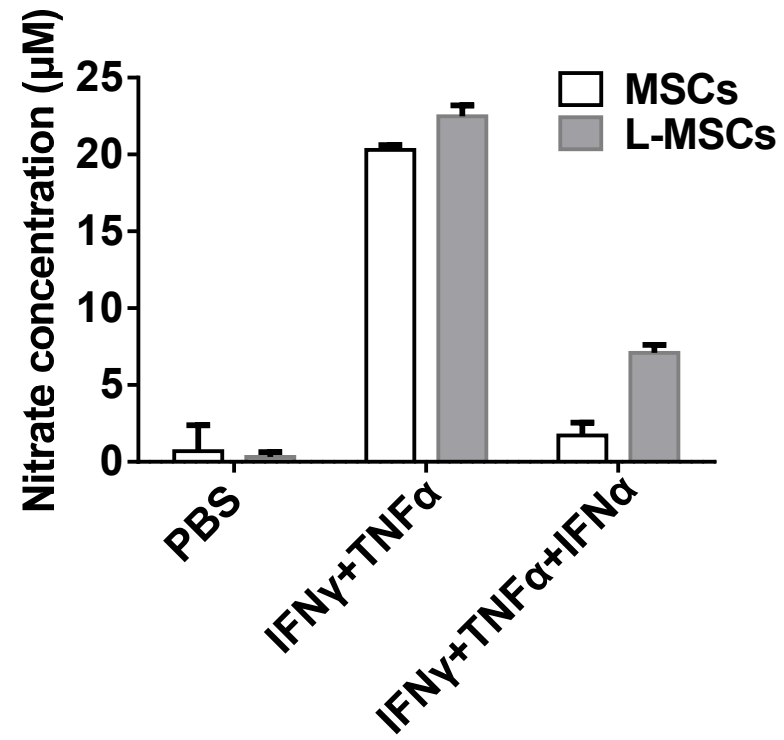

Fig. S6
